## Machine Learning for Anesthesiologists: A Primer: Erratum

In the infographic “Machine Learning for Anesthesiologists: A Primer” (Wanderer JP, Rathmell JP: ANESTHESIOLOGY 2018; 129:A29) from the October 2018 issue of ANESTHESIOLOGY, references 3 and 4 should be switched.

The authors regret this error. The article has been corrected online and in the PDF.

## Reference

1. Wanderer JP, Rathmell JP: Machine learning for anesthesiologists: A primer. ANESTHESIOLOGY 2018; 129:A29

## Disruption of Rapid Eye Movement Sleep Homeostasis in Adolescent Rats after Neonatal Anesthesia: Erratum

In the article “Disruption of Rapid Eye Movement Sleep Homeostasis in Adolescent Rats after Neonatal Anesthesia” (Lunardi N, Sica R, Atluri N, Salvati KA, Keller C, Beenhakker MP, Goodkin HP, Zuo Z: ANESTHESIOLOGY 2019; 130:981–94), the figure 2 image and legend were incorrect. They should have appeared as follows:

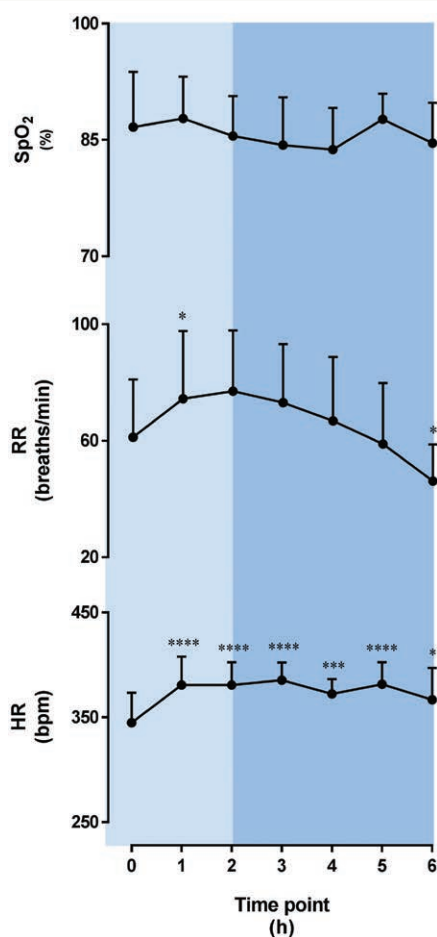

**Figure 2.** Physiologic monitoring during anesthetic exposure. Two-way repeated measures ANOVA (\* $P < 0.05$ ; \*\*\* $P < 0.001$ ; \*\*\*\* $P < 0.0001$ ). HR, heart rate; RR, respiratory rate; SpO<sub>2</sub>, oxygen peripheral saturation.

The authors regret these errors. The article has been corrected online and in the PDF.

## Reference

1. Lunardi N, Sica R, Atluri N, Salvati KA, Keller C, Beenhakker MP, Goodkin HP, Zuo Z: Disruption of rapid eye movement sleep homeostasis in adolescent rats after neonatal anesthesia. ANESTHESIOLOGY 2019; 130:981–94
